# Supplementary material
Source: PubMed Central journal article supplement (PMC3238095)

**Typical Preparation of *Francisella tularensis* O-antigen Yields a Mixture of Three  
Types of Saccharides<sup>†</sup>**

Qi Wang<sup>1</sup>, Xiaofeng Shi<sup>1</sup>, Nancy Leymarie<sup>1</sup>, Guillermo Madico<sup>2</sup>, Jacqueline Sharon<sup>2</sup>,  
Catherine E. Costello<sup>1</sup>, and Joseph Zaia<sup>1\*</sup>

<sup>1</sup> Department of Biochemistry, Boston University School of Medicine, Boston, MA 02118

<sup>2</sup> Department of Pathology and Laboratory Medicine, Boston University School of  
Medicine, Boston, MA 02118

**Supporting Information**

**Supplemental Table 1 Observed fragment ions for [4,2,2][0,0,0] from multi-stage tandem MS in positive ion mode on an LTQ-Orbitrap XL mass spectrometer.**

| Product ion (m/z)                                                                                                                                                                                                 | Charge | Saccharide Composition <sup>1</sup>           | Mass Error (ppm) | Fragmentation                                                                                                                                                                                                                            |
|-------------------------------------------------------------------------------------------------------------------------------------------------------------------------------------------------------------------|--------|-----------------------------------------------|------------------|------------------------------------------------------------------------------------------------------------------------------------------------------------------------------------------------------------------------------------------|
| MS <sup>2</sup> Precursor ion <i>m/z</i> 824.2961 (2+)                                                                                                                                                            |        |                                               |                  |                                                                                                                                                                                                                                          |
| 412.1321                                                                                                                                                                                                          | 1      | [1,0,1][0,0,0] <sup>o</sup> +Na <sup>+</sup>  | -1.4             | B <sub>2</sub>                                                                                                                                                                                                                           |
| 426.1476                                                                                                                                                                                                          | 1      | [1,1,0][0,0,0] <sup>o</sup> +Na <sup>+</sup>  | -1.7             | Z <sub>2</sub>                                                                                                                                                                                                                           |
| 430.1426                                                                                                                                                                                                          | 1      | [1,0,1][0,0,0] +Na <sup>+</sup>               | -1.5             | C <sub>2</sub>                                                                                                                                                                                                                           |
| 444.1581                                                                                                                                                                                                          | 1      | [1,1,0][0,0,0] +Na <sup>+</sup>               | -1.8             | Y <sub>2</sub>                                                                                                                                                                                                                           |
| 455.1378                                                                                                                                                                                                          | 1      | [2,0,0][0,0,0] <sup>o</sup> +Na <sup>+</sup>  | -1.5             | Y <sub>7</sub> /B <sub>3</sub> ; Z <sub>3</sub> /C <sub>7</sub> ; Y <sub>3</sub> /B <sub>7</sub> ; Z <sub>7</sub> /C <sub>3</sub>                                                                                                        |
| 473.1482                                                                                                                                                                                                          | 1      | [2,0,0][0,0,0] +Na <sup>+</sup>               | -1.8             | Y <sub>7</sub> /C <sub>3</sub> ; Y <sub>3</sub> /C <sub>7</sub>                                                                                                                                                                          |
| 628.2063                                                                                                                                                                                                          | 1      | [2,0,1][0,0,0] <sup>o</sup> +Na <sup>+</sup>  | -1.6             | B <sub>3</sub>                                                                                                                                                                                                                           |
| 629.7244                                                                                                                                                                                                          | 2      | [3,2,1][0,0,0] +2Na <sup>+</sup>              | -1.5             | Y <sub>6</sub>                                                                                                                                                                                                                           |
| 635.2143                                                                                                                                                                                                          | 2      | [4,1,1][0,0,0] <sup>o</sup> +2Na <sup>+</sup> | -1.3             | Y <sub>7</sub> /B <sub>7</sub> ; Z <sub>7</sub> /C <sub>7</sub>                                                                                                                                                                          |
| 642.2221                                                                                                                                                                                                          | 1      | [2,1,0][0,0,0] <sup>o</sup> +Na <sup>+</sup>  | -1.3             | Z <sub>3</sub>                                                                                                                                                                                                                           |
| 644.2194                                                                                                                                                                                                          | 2      | [4,1,1][0,0,0] +2Na <sup>+</sup>              | -1.6             | Y <sub>7</sub> /C <sub>7</sub>                                                                                                                                                                                                           |
| 646.2168                                                                                                                                                                                                          | 1      | [2,0,1][0,0,0] +Na <sup>+</sup>               | -1.7             | C <sub>3</sub>                                                                                                                                                                                                                           |
| 660.2324                                                                                                                                                                                                          | 1      | [2,1,0][0,0,0] +Na <sup>+</sup>               | -1.7             | Y <sub>3</sub>                                                                                                                                                                                                                           |
| 721.7491                                                                                                                                                                                                          | 2      | [4,1,2][0,0,0] <sup>o</sup> +2Na <sup>+</sup> | -0.6             | B <sub>7</sub>                                                                                                                                                                                                                           |
| 730.7540                                                                                                                                                                                                          | 2      | [4,1,2][0,0,0] +2Na <sup>+</sup>              | -1.1             | C <sub>7</sub>                                                                                                                                                                                                                           |
| 737.7610                                                                                                                                                                                                          | 2      | [4,2,1][0,0,0] +2Na <sup>+</sup>              | -2.2             | Y <sub>7</sub>                                                                                                                                                                                                                           |
| 815.2906                                                                                                                                                                                                          | 1      | [2,1,1][0,0,0] <sup>o</sup> +Na <sup>+</sup>  | -1.4             | B <sub>4</sub> ; Z <sub>4</sub> ; Y <sub>7</sub> /B <sub>5</sub> ; Z <sub>7</sub> /C <sub>5</sub> ; Y <sub>6</sub> /B <sub>6</sub> ; Z <sub>6</sub> /C <sub>6</sub> ;<br>Y <sub>5</sub> /B <sub>7</sub> ; Z <sub>5</sub> /C <sub>7</sub> |
| 833.3009                                                                                                                                                                                                          | 1      | [2,1,1][0,0,0] +Na <sup>+</sup>               | -1.7             | C <sub>4</sub> ; Y <sub>4</sub> ; Y <sub>7</sub> /C <sub>5</sub> ; Y <sub>6</sub> /C <sub>6</sub> ; Y <sub>5</sub> /C <sub>7</sub>                                                                                                       |
| 988.3593                                                                                                                                                                                                          | 1      | [2,1,2][0,0,0] <sup>o</sup> +Na <sup>+</sup>  | -1.3             | B <sub>5</sub>                                                                                                                                                                                                                           |
| 1002.3752                                                                                                                                                                                                         | 1      | [2,2,1][0,0,0] <sup>o</sup> +Na <sup>+</sup>  | -1.0             | Z <sub>5</sub>                                                                                                                                                                                                                           |
| 1020.3858                                                                                                                                                                                                         | 1      | [2,2,1][0,0,0] +Na <sup>+</sup>               | -1.0             | Y <sub>5</sub>                                                                                                                                                                                                                           |
| 1031.3651                                                                                                                                                                                                         | 1      | [3,1,1][0,0,0] <sup>o</sup> +Na <sup>+</sup>  | -1.2             | Y <sub>7</sub> /B <sub>6</sub> ; Z <sub>7</sub> /C <sub>6</sub> ; Y <sub>6</sub> /B <sub>7</sub> ; Z <sub>6</sub> /C <sub>7</sub>                                                                                                        |
| 1049.3757                                                                                                                                                                                                         | 1      | [3,1,1][0,0,0] +Na <sup>+</sup>               | -1.2             | Y <sub>7</sub> /C <sub>6</sub> ; Y <sub>6</sub> /C <sub>7</sub>                                                                                                                                                                          |
| 1204.4340                                                                                                                                                                                                         | 1      | [3,1,2][0,0,0] <sup>o</sup> +Na <sup>+</sup>  | -1.0             | B <sub>6</sub>                                                                                                                                                                                                                           |
| 1218.4495                                                                                                                                                                                                         | 1      | [3,2,1][0,0,0] <sup>o</sup> +Na <sup>+</sup>  | -1.1             | Z <sub>6</sub>                                                                                                                                                                                                                           |
| 1222.4445                                                                                                                                                                                                         | 1      | [3,1,2][0,0,0] +Na <sup>+</sup>               | -1.0             | C <sub>6</sub>                                                                                                                                                                                                                           |
| 1236.4599                                                                                                                                                                                                         | 1      | [3,2,1][0,0,0] +Na <sup>+</sup>               | -1.2             | Y <sub>6</sub>                                                                                                                                                                                                                           |
| 1438.5188                                                                                                                                                                                                         | 1      | [4,1,2][0,0,0] +Na <sup>+</sup>               | -1.1             | C <sub>7</sub>                                                                                                                                                                                                                           |
| 1452.5338                                                                                                                                                                                                         | 1      | [4,2,1][0,0,0] +Na <sup>+</sup>               | -1.5             | Y <sub>7</sub>                                                                                                                                                                                                                           |
| 1625.6023                                                                                                                                                                                                         | 1      | [4,2,2][0,0,0] +Na <sup>+</sup>               | -1.6             | [M+Na] <sup>+</sup>                                                                                                                                                                                                                      |
| MS <sup>3</sup> Precursor ion <i>m/z</i> 833.3009 (1+), to simplify the nomenclature of the MS <sup>3</sup> fragment ions, Y <sub>4</sub> is assumed to be the precursor ion of MS <sup>3</sup> unless specified. |        |                                               |                  |                                                                                                                                                                                                                                          |
| 239.0634                                                                                                                                                                                                          | 1      | [1,0,0][0,0,0] <sup>o</sup> +Na <sup>+</sup>  | -2.0             | Y <sub>3</sub> /B <sub>6</sub> ; Z <sub>3</sub> /C <sub>6</sub> ; Y <sub>2</sub> /B <sub>7</sub> ; Z <sub>2</sub> /C <sub>7</sub>                                                                                                        |
| 257.0738                                                                                                                                                                                                          | 1      | [1,0,0][0,0,0] +Na <sup>+</sup>               | -2.6             | Y <sub>3</sub> /C <sub>6</sub> ; Y <sub>2</sub> /C <sub>7</sub>                                                                                                                                                                          |
| 412.1316                                                                                                                                                                                                          | 1      | [1,0,1][0,0,0] <sup>o</sup> +Na <sup>+</sup>  | -2.7             | Y <sub>4</sub> /B <sub>6</sub>                                                                                                                                                                                                           |
| 426.1472                                                                                                                                                                                                          | 1      | [1,1,0][0,0,0] <sup>o</sup> +Na <sup>+</sup>  | -2.7             | Z <sub>2</sub>                                                                                                                                                                                                                           |
| 444.1576                                                                                                                                                                                                          | 1      | [1,1,0][0,0,0] +Na <sup>+</sup>               | -3.0             | Y <sub>2</sub>                                                                                                                                                                                                                           |
| 455.1372                                                                                                                                                                                                          | 1      | [2,0,0][0,0,0] <sup>o</sup> +Na <sup>+</sup>  | -2.9             | Y <sub>3</sub> /B <sub>7</sub> ; Z <sub>3</sub> /C <sub>7</sub>                                                                                                                                                                          |
| 473.1476                                                                                                                                                                                                          | 1      | [2,0,0][0,0,0] +Na <sup>+</sup>               | -3.2             | Y <sub>3</sub> /C <sub>7</sub>                                                                                                                                                                                                           |
| 545.1685                                                                                                                                                                                                          | 1      |                                               | -3.1             | <sup>0,2</sup> A <sub>3</sub> from C <sub>4</sub>                                                                                                                                                                                        |

|                                                        |   |                                              |      |                                                                                                                                                                                                                                                                                 |
|--------------------------------------------------------|---|----------------------------------------------|------|---------------------------------------------------------------------------------------------------------------------------------------------------------------------------------------------------------------------------------------------------------------------------------|
| 599.2156                                               | 1 | [1,1,1][0,0,0] <sup>o</sup> +Na <sup>+</sup> | -2.6 | Y <sub>6</sub> /B <sub>5</sub> ; Z <sub>6</sub> /C <sub>5</sub> from Y <sub>7</sub> /C <sub>5</sub> ; Y <sub>6</sub> /C <sub>6</sub> or<br>Y <sub>5</sub> /B <sub>6</sub> ; Z <sub>5</sub> /C <sub>6</sub> from Y <sub>6</sub> /C <sub>6</sub> ; Y <sub>5</sub> /C <sub>7</sub> |
| 628.2053                                               | 1 | [2,0,1][0,0,0] <sup>o</sup> +Na <sup>+</sup> | -3.3 | Y <sub>4</sub> /B <sub>7</sub>                                                                                                                                                                                                                                                  |
| 642.2210                                               | 1 | [2,1,0][0,0,0] <sup>o</sup> +Na <sup>+</sup> | -3.1 | Z <sub>3</sub>                                                                                                                                                                                                                                                                  |
| 646.2158                                               | 1 | [2,0,1][0,0,0] +Na <sup>+</sup>              | -3.3 | Y <sub>4</sub> /C <sub>7</sub>                                                                                                                                                                                                                                                  |
| 660.2314                                               | 1 | [2,1,0][0,0,0] +Na <sup>+</sup>              | -3.3 | Y <sub>3</sub>                                                                                                                                                                                                                                                                  |
| 815.2895                                               | 1 | [2,1,1][0,0,0] <sup>o</sup> +Na <sup>+</sup> | -2.8 | Z <sub>4</sub>                                                                                                                                                                                                                                                                  |
| MS <sup>4</sup> Precursor ion <i>m/z</i> 646.2158 (1+) |   |                                              |      |                                                                                                                                                                                                                                                                                 |
| 239.0632                                               | 1 | [1,0,0][0,0,0] <sup>o</sup> +Na <sup>+</sup> | -3.0 | Y <sub>3</sub> /B <sub>6</sub> ; Z <sub>3</sub> /C <sub>6</sub> ; Y <sub>2</sub> /B <sub>7</sub> ; Z <sub>2</sub> /C <sub>7</sub>                                                                                                                                               |
| 257.0739                                               | 1 | [1,0,0][0,0,0] +Na <sup>+</sup>              | -2.2 | Y <sub>3</sub> /C <sub>6</sub> ; Y <sub>2</sub> /C <sub>7</sub>                                                                                                                                                                                                                 |
| 412.1316                                               | 1 | [1,0,1][0,0,0] <sup>o</sup> +Na <sup>+</sup> | -2.7 | Y <sub>4</sub> /B <sub>6</sub> ; Z <sub>4</sub> /C <sub>6</sub>                                                                                                                                                                                                                 |
| 430.1421                                               | 1 | [1,0,1][0,0,0] +Na <sup>+</sup>              | -2.7 | Y <sub>4</sub> /C <sub>6</sub>                                                                                                                                                                                                                                                  |
| 455.1372                                               | 1 | [2,0,0][0,0,0] <sup>o</sup> +Na <sup>+</sup> | -2.9 | Y <sub>3</sub> /B <sub>7</sub> ; Z <sub>3</sub> /C <sub>7</sub>                                                                                                                                                                                                                 |
| 473.1475                                               | 1 | [2,0,0][0,0,0] +Na <sup>+</sup>              | -3.4 | Y <sub>3</sub> /C <sub>7</sub>                                                                                                                                                                                                                                                  |
| 545.1684                                               | 1 |                                              | -3.3 | <sup>0,2</sup> A <sub>3</sub> from C <sub>4</sub>                                                                                                                                                                                                                               |
| 628.2055                                               | 1 | [2,0,1][0,0,0] <sup>o</sup> +Na <sup>+</sup> | -2.9 | Y <sub>4</sub> /B <sub>7</sub> ; Z <sub>4</sub> /C <sub>7</sub>                                                                                                                                                                                                                 |
| MS <sup>4</sup> Precursor ion <i>m/z</i> 660.2314 (1+) |   |                                              |      |                                                                                                                                                                                                                                                                                 |
| 228.0836                                               | 1 | [0,1,0][0,0,0] +Na <sup>+</sup>              | -3.1 | Y <sub>1</sub>                                                                                                                                                                                                                                                                  |
| 239.0632                                               | 1 | [1,0,0][0,0,0] <sup>o</sup> +Na <sup>+</sup> | -3   | Y <sub>3</sub> /B <sub>6</sub> ; Z <sub>3</sub> /C <sub>6</sub> ; Y <sub>2</sub> /B <sub>7</sub> ; Z <sub>2</sub> /C <sub>7</sub>                                                                                                                                               |
| 257.0738                                               | 1 | [1,0,0][0,0,0] +Na <sup>+</sup>              | -2.6 | Y <sub>3</sub> /C <sub>6</sub> ; Y <sub>2</sub> /C <sub>7</sub>                                                                                                                                                                                                                 |
| 426.1471                                               | 1 | [1,1,0][0,0,0] <sup>o</sup> +Na <sup>+</sup> | -3.0 | Z <sub>2</sub>                                                                                                                                                                                                                                                                  |
| 444.1575                                               | 1 | [1,1,0][0,0,0] +Na <sup>+</sup>              | -3.2 | Y <sub>2</sub>                                                                                                                                                                                                                                                                  |
| 455.1371                                               | 1 | [2,0,0][0,0,0] <sup>o</sup> +Na <sup>+</sup> | -3.2 | Y <sub>3</sub> /B <sub>7</sub> ; Z <sub>3</sub> /C <sub>7</sub>                                                                                                                                                                                                                 |
| 473.1474                                               | 1 | [2,0,0][0,0,0] +Na <sup>+</sup>              | -3.6 | Y <sub>3</sub> /C <sub>7</sub>                                                                                                                                                                                                                                                  |
| 642.2208                                               | 1 | [2,1,0][0,0,0] <sup>o</sup> +Na <sup>+</sup> | -3.4 | Z <sub>3</sub>                                                                                                                                                                                                                                                                  |

<sup>1</sup>Saccharide compositions are given as [GalNAcAN, QuiNAc, Qui4NFm] [HexNAc, Hex, Kdo].

<sup>o</sup> represents loss of water.

**Supplemental Table 2 Observed fragment ions for <sup>18</sup>O labeled [4,2,2][0,0,0] from multi-stage tandem MS in positive ion mode on an LTQ-Orbitrap XL mass spectrometer.**

| Product ion (m/z)                               | Charge | Saccharide Composition <sup>1</sup>                                            | Mass Error (ppm) | Fragmentation                                                                                                                                                                                                           |
|-------------------------------------------------|--------|--------------------------------------------------------------------------------|------------------|-------------------------------------------------------------------------------------------------------------------------------------------------------------------------------------------------------------------------|
| MS <sup>2</sup> Precursor ion m/z 825.2987 (2+) |        |                                                                                |                  |                                                                                                                                                                                                                         |
| 428.1519                                        | 1      | [1,1,0][0,0,0] <sup>o</sup> + <sup>18</sup> O- <sup>16</sup> O+Na <sup>+</sup> | -1.6             | Z <sub>2</sub>                                                                                                                                                                                                          |
| 646.2168                                        | 1      | [2,0,1][0,0,0]+Na <sup>+</sup>                                                 | -1.7             | C <sub>3</sub>                                                                                                                                                                                                          |
| 662.2367                                        | 1      | [2,1,0][0,0,0]+ <sup>18</sup> O- <sup>16</sup> O+Na <sup>+</sup>               | -1.6             | Y <sub>3</sub>                                                                                                                                                                                                          |
| 730.7539                                        | 2      | [4,1,2][0,0,0]+2Na <sup>+</sup>                                                | -1.2             | C <sub>7</sub>                                                                                                                                                                                                          |
| 738.7635                                        | 2      | [4,2,1][0,0,0]+ <sup>18</sup> O- <sup>16</sup> O+2Na <sup>+</sup>              | -1.7             | Y <sub>7</sub>                                                                                                                                                                                                          |
| 815.2906                                        | 1      | [2,1,1][0,0,0] <sup>o</sup> +Na <sup>+</sup>                                   | -1.4             | B <sub>4</sub> ; Y <sub>7</sub> /B <sub>5</sub> ; Z <sub>7</sub> /C <sub>5</sub> ; Y <sub>6</sub> /B <sub>6</sub> ;<br>Z <sub>6</sub> /C <sub>6</sub> ; Y <sub>5</sub> /B <sub>7</sub> ; Z <sub>5</sub> /C <sub>7</sub> |
| 835.3053                                        | 1      | [2,1,1][0,0,0]+ <sup>18</sup> O- <sup>16</sup> O+Na <sup>+</sup>               | -1.5             | Y <sub>4</sub>                                                                                                                                                                                                          |
| 988.3594                                        | 1      | [2,1,2][0,0,0] <sup>o</sup> +Na <sup>+</sup>                                   | -1.2             | B <sub>5</sub>                                                                                                                                                                                                          |
| 1004.3794                                       | 1      | [2,2,1][0,0,0] <sup>o</sup> + <sup>18</sup> O- <sup>16</sup> O+Na <sup>+</sup> | -1.1             | Z <sub>5</sub>                                                                                                                                                                                                          |
| 1022.3901                                       | 1      | [2,2,1][0,0,0]+ <sup>18</sup> O- <sup>16</sup> O+Na <sup>+</sup>               | -0.9             | Y <sub>5</sub>                                                                                                                                                                                                          |
| 1049.3758                                       | 1      | [3,1,1][0,0,0]+Na <sup>+</sup>                                                 | -1.1             | Y <sub>7</sub> /C <sub>6</sub> ; Y <sub>6</sub> /C <sub>7</sub>                                                                                                                                                         |
| 1204.4342                                       | 1      | [3,1,2][0,0,0] <sup>o</sup> +Na <sup>+</sup>                                   | -0.8             | B <sub>6</sub>                                                                                                                                                                                                          |
| 1222.4447                                       | 1      | [3,1,2][0,0,0]+Na <sup>+</sup>                                                 | -0.9             | C <sub>6</sub>                                                                                                                                                                                                          |
| 1238.4646                                       | 1      | [3,2,1][0,0,0]+ <sup>18</sup> O- <sup>16</sup> O+Na <sup>+</sup>               | -0.8             | Y <sub>6</sub>                                                                                                                                                                                                          |
| 1438.5191                                       | 1      | [4,1,2][0,0,0]+Na <sup>+</sup>                                                 | -0.9             | C <sub>7</sub>                                                                                                                                                                                                          |
| 1627.6078                                       | 1      | [4,2,2][0,0,0]+ <sup>18</sup> O- <sup>16</sup> O+2Na <sup>+</sup>              | -0.8             | [M+Na] <sup>+</sup>                                                                                                                                                                                                     |
| MS <sup>3</sup> Precursor ion m/z 835.3053 (1+) |        |                                                                                |                  |                                                                                                                                                                                                                         |
| 412.1317                                        | 1      | [1,0,1][0,0,0] <sup>o</sup> +Na <sup>+</sup>                                   | -2.4             | Y <sub>4</sub> /B <sub>6</sub>                                                                                                                                                                                          |
| 428.1516                                        | 1      | [1,1,0][0,0,0] <sup>o</sup> + <sup>18</sup> O- <sup>16</sup> O+Na <sup>+</sup> | -2.3             | Z <sub>2</sub>                                                                                                                                                                                                          |
| 430.1422                                        | 1      | [1,0,1][0,0,0]+Na <sup>+</sup>                                                 | -2.5             | Y <sub>4</sub> /C <sub>6</sub>                                                                                                                                                                                          |
| 446.1621                                        | 1      | [1,1,0][0,0,0]+ <sup>18</sup> O- <sup>16</sup> O+Na <sup>+</sup>               | -2.4             | Y <sub>2</sub>                                                                                                                                                                                                          |
| 473.1479                                        | 1      | [2,0,0][0,0,0]+Na <sup>+</sup>                                                 | -2.5             | Y <sub>3</sub> /C <sub>7</sub>                                                                                                                                                                                          |
| 628.2057                                        | 1      | [2,0,1][0,0,0] <sup>o</sup> +Na <sup>+</sup>                                   | -2.6             | Y <sub>4</sub> /B <sub>7</sub> ; Z <sub>4</sub> /C <sub>7</sub>                                                                                                                                                         |
| 646.2163                                        | 1      | [2,0,1][0,0,0]+Na <sup>+</sup>                                                 | -2.5             | Y <sub>4</sub> /C <sub>7</sub>                                                                                                                                                                                          |
| 662.2362                                        | 1      | [2,1,0][0,0,0]+ <sup>18</sup> O- <sup>16</sup> O+Na <sup>+</sup>               | -2.4             | Y <sub>3</sub>                                                                                                                                                                                                          |

<sup>1</sup>Saccharide compositions are given as [GalNAcAN, QuiNAc, Qui4NFm] [HexNAc, Hex, Kdo].

<sup>o</sup> represents loss of water.

**Supplemental Table 3 Observed fragment ions for [4,2,2][0,0,0] and [6,3,3][0,0,0] from tandem MS in negative ion mode on an FT-ICR mass spectrometer.**

| Observed Peaks (m/z)                                | Charge | Saccharide Composition <sup>1</sup>                | Mass Accuracy (ppm) | Fragmentation                                                                                                                                                                                                                                                                |
|-----------------------------------------------------|--------|----------------------------------------------------|---------------------|------------------------------------------------------------------------------------------------------------------------------------------------------------------------------------------------------------------------------------------------------------------------------|
| MS <sup>2</sup> of Precursor ion m/z 846.3049 (2-)  |        |                                                    |                     |                                                                                                                                                                                                                                                                              |
| 215.0674                                            | 1      | [1,0,0][0,0,0] <sup>0</sup> -[H <sup>+</sup> ]     | 0.3                 | Y <sub>7</sub> /B <sub>2</sub> ; Z <sub>7</sub> /C <sub>2</sub> ; Y <sub>6</sub> /B <sub>3</sub> ; Z <sub>6</sub> /C <sub>3</sub> ;<br>Y <sub>3</sub> /B <sub>6</sub> ; Z <sub>3</sub> /C <sub>6</sub> ; Y <sub>2</sub> /B <sub>7</sub> ; Z <sub>2</sub> /C <sub>7</sub>     |
| 232.0827                                            | 1      | [0,1,0][0,0,0] <sup>0,**</sup> -[H <sup>+</sup> ]  | 0.2                 | Z <sub>1</sub>                                                                                                                                                                                                                                                               |
| 236.0776                                            | 1      | [0,0,1][0,0,0] <sup>**</sup> -[H <sup>+</sup> ]    | 0.1                 | C <sub>1</sub>                                                                                                                                                                                                                                                               |
| 305.0991                                            | 1      |                                                    | 0.2                 | <sup>0,2</sup> A <sub>2</sub>                                                                                                                                                                                                                                                |
| 402.1518                                            | 1      | [1,1,0][0,0,0] <sup>0</sup> -[H <sup>+</sup> ]     | 0.0                 | Z <sub>2</sub>                                                                                                                                                                                                                                                               |
| 431.1419                                            | 1      | [2,0,0][0,0,0] <sup>0</sup> -[H <sup>+</sup> ]     | -0.2                | Y <sub>7</sub> /B <sub>3</sub> ; Z <sub>7</sub> /C <sub>3</sub> ; Y <sub>3</sub> /B <sub>7</sub> ; Z <sub>3</sub> /C <sub>7</sub>                                                                                                                                            |
| 448.1572                                            | 1      | [1,1,0][0,0,0] <sup>0,**</sup> -[H <sup>+</sup> ]  | -0.2                | Z <sub>2</sub>                                                                                                                                                                                                                                                               |
| 575.2204                                            | 1      | [1,1,1][0,0,0] <sup>0</sup> -[H <sup>+</sup> ]     | -0.4                | Y <sub>6</sub> /B <sub>5</sub> ; Z <sub>6</sub> /C <sub>5</sub> ; Y <sub>5</sub> /B <sub>6</sub> ; Z <sub>5</sub> /C <sub>6</sub>                                                                                                                                            |
| 618.2261                                            | 1      | [2,1,0][0,0,0] <sup>0</sup> -[H <sup>+</sup> ]     | -0.5                | Z <sub>3</sub>                                                                                                                                                                                                                                                               |
| 656.2338                                            | 2      |                                                    | -0.9                | <sup>0,2</sup> A <sub>7</sub>                                                                                                                                                                                                                                                |
| 664.2314                                            | 1      | [2,1,0][0,0,0] <sup>0,**</sup> -[H <sup>+</sup> ]  | -0.8                | Z <sub>3</sub>                                                                                                                                                                                                                                                               |
| 706.7577                                            | 2      | [4,1,2][0,0,0] <sup>-2</sup> [H <sup>+</sup> ]     | -0.8                | C <sub>7</sub>                                                                                                                                                                                                                                                               |
| 727.7631                                            | 2      | [4,2,1][0,0,0] <sup>0,**</sup> -2[H <sup>+</sup> ] | -0.6                | Z <sub>7</sub>                                                                                                                                                                                                                                                               |
| 729.7605                                            | 2      | [4,1,2][0,0,0] <sup>**</sup> -2[H <sup>+</sup> ]   | -0.7                | C <sub>7</sub>                                                                                                                                                                                                                                                               |
| 791.2946                                            | 1      | [2,1,1][0,0,0] <sup>0</sup> -[H <sup>+</sup> ]     | -0.8                | B <sub>4</sub> ; Z <sub>4</sub>                                                                                                                                                                                                                                              |
| 800.2995                                            | 2      | [4,2,2][0,0,0] <sup>-2</sup> [H <sup>+</sup> ]     | -1.3                | [M-2H] <sup>2-</sup>                                                                                                                                                                                                                                                         |
| 823.3025                                            | 2      | [4,2,2][0,0,0] <sup>**</sup> -2[H <sup>+</sup> ]   | -0.9                | [M+FA-2H] <sup>2-</sup>                                                                                                                                                                                                                                                      |
| 846.3053                                            | 2      | [4,2,2][0,0,0] <sup>2,**</sup> -2[H <sup>+</sup> ] | -0.8                | [M+2FA-2H] <sup>2-</sup>                                                                                                                                                                                                                                                     |
| 982.3734                                            | 1      | [2,1,2][0,0,0] <sup>0</sup> -[H <sup>+</sup> ]     | -1.2                | C <sub>5</sub>                                                                                                                                                                                                                                                               |
| 1007.3688                                           | 1      | [3,1,1][0,0,0] <sup>0</sup> -[H <sup>+</sup> ]     | -1.0                | Y <sub>7</sub> /B <sub>6</sub> ; Z <sub>7</sub> /C <sub>6</sub> ; Y <sub>6</sub> /B <sub>7</sub> ; Z <sub>6</sub> /C <sub>7</sub>                                                                                                                                            |
| 1024.3839                                           | 1      |                                                    | -1.2                | <sup>2,4</sup> A <sub>6</sub>                                                                                                                                                                                                                                                |
| 1028.3788                                           | 1      | [2,1,2][0,0,0] <sup>**</sup> -[H <sup>+</sup> ]    | -1.2                | C <sub>5</sub>                                                                                                                                                                                                                                                               |
| 1097.4002                                           | 1      |                                                    | -1.2                | <sup>0,2</sup> A <sub>6</sub>                                                                                                                                                                                                                                                |
| 1180.4371                                           | 1      | [3,1,2][0,0,0] <sup>0</sup> -[H <sup>+</sup> ]     | -1.3                | B <sub>6</sub>                                                                                                                                                                                                                                                               |
| 1198.4477                                           | 1      | [3,1,2][0,0,0] <sup>0</sup> -[H <sup>+</sup> ]     | -1.3                | C <sub>6</sub>                                                                                                                                                                                                                                                               |
| 1223.4428                                           | 1      | [4,1,1][0,0,0] <sup>0</sup> -[H <sup>+</sup> ]     | -1.4                | Y <sub>7</sub> /B <sub>7</sub> ; Z <sub>7</sub> /C <sub>7</sub>                                                                                                                                                                                                              |
| 1240.4581                                           | 1      |                                                    | -1.4                | <sup>2,4</sup> A <sub>7</sub>                                                                                                                                                                                                                                                |
| 1244.4529                                           | 1      | [3,1,2][0,0,0] <sup>**</sup> -[H <sup>+</sup> ]    | -1.5                | C <sub>6</sub>                                                                                                                                                                                                                                                               |
| 1295.4640                                           | 1      |                                                    | -1.2                | <sup>0,2</sup> A <sub>7</sub> -H <sub>2</sub> O                                                                                                                                                                                                                              |
| 1313.4740                                           | 1      |                                                    | -1.6                | <sup>0,2</sup> A <sub>7</sub>                                                                                                                                                                                                                                                |
| 1396.5116                                           | 1      | [4,1,2][0,0,0] <sup>0</sup> -[H <sup>+</sup> ]     | -1.2                | B <sub>7</sub>                                                                                                                                                                                                                                                               |
| 1410.5256                                           | 1      | [4,2,1][0,0,0] <sup>0</sup> -[H <sup>+</sup> ]     | -2.4                | Z <sub>7</sub>                                                                                                                                                                                                                                                               |
| 1414.5215                                           | 1      | [4,1,2][0,0,0] <sup>0</sup> -[H <sup>+</sup> ]     | -1.7                | C <sub>7</sub>                                                                                                                                                                                                                                                               |
| 1460.5269                                           | 1      | [4,1,2][0,0,0] <sup>**</sup> -[H <sup>+</sup> ]    | -1.7                | C <sub>7</sub>                                                                                                                                                                                                                                                               |
| MS <sup>2</sup> of Precursor ion m/z 1242.4535 (2-) |        |                                                    |                     |                                                                                                                                                                                                                                                                              |
| 402.1516                                            | 1      | [1,1,0][0,0,0] <sup>0</sup> -[H <sup>+</sup> ]     | -0.5                | Z <sub>2</sub>                                                                                                                                                                                                                                                               |
| 431.1418                                            | 1      | [2,0,0][0,0,0] <sup>0</sup> -[H <sup>+</sup> ]     | -0.4                | Y <sub>11</sub> /B <sub>3</sub> ; Z <sub>11</sub> /C <sub>3</sub> ; Y <sub>7</sub> /B <sub>7</sub> ; Z <sub>7</sub> /C <sub>7</sub> ;<br>Y <sub>3</sub> /B <sub>11</sub> ; Z <sub>3</sub> /C <sub>11</sub>                                                                   |
| 575.2202                                            | 1      | [1,1,1][0,0,0] <sup>0</sup> -[H <sup>+</sup> ]     | -0.7                | Y <sub>10</sub> /B <sub>5</sub> ; Z <sub>10</sub> /C <sub>5</sub> ; Y <sub>9</sub> /B <sub>6</sub> ; Z <sub>9</sub> /C <sub>6</sub> ;<br>Y <sub>6</sub> /B <sub>9</sub> ; Z <sub>6</sub> /C <sub>9</sub> ; Y <sub>5</sub> /B <sub>10</sub> ; Z <sub>5</sub> /C <sub>10</sub> |

|           |   |                                                    |      |                                                                                                                                                                                                                                                                                  |
|-----------|---|----------------------------------------------------|------|----------------------------------------------------------------------------------------------------------------------------------------------------------------------------------------------------------------------------------------------------------------------------------|
| 618.2258  | 1 | [2,1,0][0,0,0] <sup>o</sup> -[H <sup>+</sup> ]     | -1.0 | Z <sub>3</sub>                                                                                                                                                                                                                                                                   |
| 664.2311  | 1 | [2,1,0][0,0,0] <sup>o,**</sup> -[H <sup>+</sup> ]  | -1.2 | Z <sub>3</sub>                                                                                                                                                                                                                                                                   |
| 791.2939  | 1 | [2,1,1][0,0,0] <sup>o</sup> -[H <sup>+</sup> ]     | -1.7 | B <sub>4</sub> ; Z <sub>4</sub>                                                                                                                                                                                                                                                  |
| 837.3001  | 1 | [2,1,1][0,0,0] <sup>o,**</sup> -[H <sup>+</sup> ]  | -0.7 | B <sub>4</sub> ; Z <sub>4</sub>                                                                                                                                                                                                                                                  |
| 944.3460  | 2 |                                                    | -2.5 | <sup>0,2</sup> A <sub>10</sub>                                                                                                                                                                                                                                                   |
| 982.3728  | 1 | [2,1,2][0,0,0] <sup>o</sup> -[H <sup>+</sup> ]     | -1.8 | C <sub>5</sub>                                                                                                                                                                                                                                                                   |
| 1007.3685 | 1 | [3,1,1][0,0,0] <sup>o</sup> -[H <sup>+</sup> ]     | -1.3 | Y <sub>11</sub> /B <sub>6</sub> ; Z <sub>11</sub> /C <sub>6</sub> ; Y <sub>10</sub> /B <sub>7</sub> ; Z <sub>10</sub> /C <sub>7</sub> ;<br>Y <sub>7</sub> /B <sub>10</sub> ; Z <sub>7</sub> /C <sub>10</sub> ; Y <sub>6</sub> /B <sub>11</sub> ; Z <sub>6</sub> /C <sub>11</sub> |
| 1015.8758 | 2 | [5,3,2][0,0,0] <sup>o,**</sup> -2[H <sup>+</sup> ] | -1.7 | Z <sub>10</sub>                                                                                                                                                                                                                                                                  |
| 1028.3780 | 1 | [2,1,2][0,0,0] <sup>**</sup> -[H <sup>+</sup> ]    | -2.0 | C <sub>5</sub>                                                                                                                                                                                                                                                                   |
| 1052.3834 | 2 |                                                    | -2.2 | <sup>0,2</sup> A <sub>11</sub>                                                                                                                                                                                                                                                   |
| 1093.9021 | 2 | [6,2,3][0,0,0] <sup>o</sup> -2[H <sup>+</sup> ]    | -2.0 | B <sub>11</sub>                                                                                                                                                                                                                                                                  |
| 1097.3993 | 1 |                                                    | -2.0 | <sup>0,2</sup> A <sub>6</sub>                                                                                                                                                                                                                                                    |
| 1100.9096 | 2 | [6,3,2][0,0,0] <sup>o</sup> -2[H <sup>+</sup> ]    | -2.3 | Z <sub>11</sub>                                                                                                                                                                                                                                                                  |
| 1102.9063 | 2 | [6,2,3][0,0,0] <sup>o</sup> -2[H <sup>+</sup> ]    | -2.9 | C <sub>11</sub>                                                                                                                                                                                                                                                                  |
| 1123.9125 | 2 | [6,3,2][0,0,0] <sup>o,**</sup> -2[H <sup>+</sup> ] | -2.1 | Z <sub>11</sub>                                                                                                                                                                                                                                                                  |
| 1180.4363 | 1 | [3,1,2][0,0,0] <sup>o</sup> -[H <sup>+</sup> ]     | -2.0 | B <sub>6</sub>                                                                                                                                                                                                                                                                   |
| 1194.4516 | 1 | [3,2,1][0,0,0] <sup>o</sup> -[H <sup>+</sup> ]     | -2.3 | Z <sub>6</sub>                                                                                                                                                                                                                                                                   |
| 1196.4491 | 2 | [6,3,3][0,0,0] <sup>o</sup> -2[H <sup>+</sup> ]    | -2.2 | [M-2H] <sup>2-</sup>                                                                                                                                                                                                                                                             |
| 1205.4533 | 2 | [6,3,3][0,0,0] <sup>o</sup> -2[H <sup>+</sup> ]    | -3.1 | [M-H <sub>2</sub> O-2H] <sup>2-</sup>                                                                                                                                                                                                                                            |
| 1219.4512 | 2 | [6,3,3][0,0,0] <sup>**</sup> -2[H <sup>+</sup> ]   | -2.7 | [M+FA-2H] <sup>2-</sup>                                                                                                                                                                                                                                                          |
| 1223.4419 | 1 | [4,1,1][0,0,0] <sup>o</sup> -[H <sup>+</sup> ]     | -2.1 | Y <sub>11</sub> /B <sub>7</sub> ; Z <sub>11</sub> /C <sub>7</sub> ; Y <sub>7</sub> /B <sub>11</sub> ; Z <sub>7</sub> /C <sub>11</sub>                                                                                                                                            |
| 1367.5196 | 1 | [3,2,2][0,0,0] <sup>o</sup> -[H <sup>+</sup> ]     | -2.6 | Y <sub>10</sub> /B <sub>7</sub> ; Z <sub>10</sub> /C <sub>7</sub> ; Y <sub>9</sub> /B <sub>10</sub> ; Z <sub>9</sub> /C <sub>10</sub>                                                                                                                                            |
| 1410.5249 | 1 | [4,2,1][0,0,0] <sup>o</sup> -[H <sup>+</sup> ]     | -2.9 | Z <sub>7</sub>                                                                                                                                                                                                                                                                   |
| 1583.5931 | 1 | [4,2,2][0,0,0] <sup>o</sup> -[H <sup>+</sup> ]     | -2.9 | B <sub>8</sub> ; Z <sub>8</sub>                                                                                                                                                                                                                                                  |
| 1774.6715 | 1 | [4,2,3][0,0,0] <sup>o</sup> -[H <sup>+</sup> ]     | -3.2 | C <sub>9</sub>                                                                                                                                                                                                                                                                   |
| 1889.6987 | 1 |                                                    | -2.8 | <sup>0,2</sup> A <sub>10</sub>                                                                                                                                                                                                                                                   |

<sup>1</sup>Saccharide compositions are given as [GalNAcAN, QuiNAc, Qui4NFm] [HexNAc, Hex, Kdo].

<sup>o</sup> represents loss of water; <sup>+o</sup> represents water adduct; \*\* stands for formic acid adduct; and \* stands for loss of formic acid.

**Supplemental Table 4 Observed fragment ions for [6,3,3][0,0,0] from multi-stage tandem MS in positive ion mode on an LTQ-Orbitrap XL mass spectrometer.**

| Product ion (m/z)                                | Charge | Saccharide Composition <sup>1</sup>           | Mass Error (ppm) | Fragmentation                                                                                                                                                                                              |
|--------------------------------------------------|--------|-----------------------------------------------|------------------|------------------------------------------------------------------------------------------------------------------------------------------------------------------------------------------------------------|
| MS <sup>2</sup> Precursor ion m/z 1220.4479 (2+) |        |                                               |                  |                                                                                                                                                                                                            |
| 412.1320                                         | 1      | [1,0,1][0,0,0] <sup>o</sup> +Na <sup>+</sup>  | -1.7             | B <sub>2</sub>                                                                                                                                                                                             |
| 426.1476                                         | 1      | [1,1,0][0,0,0] <sup>o</sup> +Na <sup>+</sup>  | -1.7             | Z <sub>2</sub>                                                                                                                                                                                             |
| 430.1424                                         | 1      | [1,0,1][0,0,0] +Na <sup>+</sup>               | -2.0             | C <sub>2</sub>                                                                                                                                                                                             |
| 444.1581                                         | 1      | [1,1,0][0,0,0] +Na <sup>+</sup>               | -1.8             | Y <sub>2</sub>                                                                                                                                                                                             |
| 455.1376                                         | 1      | [2,0,0][0,0,0] <sup>o</sup> +Na <sup>+</sup>  | -2.0             | Y <sub>11</sub> /B <sub>3</sub> ; Z <sub>11</sub> /C <sub>3</sub> ; Y <sub>7</sub> /B <sub>7</sub> ; Z <sub>7</sub> /C <sub>7</sub> ;<br>Y <sub>3</sub> /B <sub>11</sub> ; Z <sub>3</sub> /C <sub>11</sub> |
| 473.1480                                         | 1      | [2,0,0][0,0,0] +Na <sup>+</sup>               | -2.3             | Y <sub>11</sub> /C <sub>3</sub> ; Y <sub>7</sub> /C <sub>7</sub> ; Y <sub>3</sub> /C <sub>11</sub>                                                                                                         |
| 628.2062                                         | 1      | [2,0,1][0,0,0] <sup>o</sup> +Na <sup>+</sup>  | -1.8             | B <sub>3</sub>                                                                                                                                                                                             |
| 642.2219                                         | 1      | [2,1,0][0,0,0] <sup>o</sup> +Na <sup>+</sup>  | -1.6             | Z <sub>3</sub>                                                                                                                                                                                             |
| 646.2162                                         | 1      | [2,0,1][0,0,0] +Na <sup>+</sup>               | -2.6             | C <sub>3</sub>                                                                                                                                                                                             |
| 660.2323                                         | 1      | [2,1,0][0,0,0] +Na <sup>+</sup>               | -1.9             | Y <sub>3</sub>                                                                                                                                                                                             |
| 815.2897                                         | 1      | [2,1,1][0,0,0] <sup>o</sup> +Na <sup>+</sup>  | -2.6             | B <sub>4</sub> ; Z <sub>4</sub>                                                                                                                                                                            |
| 833.3003                                         | 1      | [2,1,1][0,0,0] +Na <sup>+</sup>               | -2.5             | C <sub>4</sub> ; Y <sub>4</sub>                                                                                                                                                                            |
| 901.8249                                         | 2      | [4,2,3][0,0,0] <sup>o</sup> +2Na <sup>+</sup> | -1.4             | B <sub>9</sub>                                                                                                                                                                                             |
| 910.8305                                         | 2      | [4,2,3][0,0,0]+2Na <sup>+</sup>               | -1.0             | C <sub>9</sub>                                                                                                                                                                                             |
| 917.8388                                         | 2      | [4,3,2][0,0,0]+2Na <sup>+</sup>               | -0.5             | Y <sub>9</sub>                                                                                                                                                                                             |
| 923.3280                                         | 2      | [5,2,2][0,0,0] <sup>o</sup> +2Na <sup>+</sup> | -1.2             | Y <sub>10</sub> /B <sub>11</sub> ; Z <sub>10</sub> /C <sub>11</sub> ; Y <sub>11</sub> /B <sub>10</sub> ; Z <sub>11</sub> /C <sub>10</sub>                                                                  |
| 932.3331                                         | 2      | [5,2,2][0,0,0] <sup>o</sup> +2Na <sup>+</sup> | -1.3             | Y <sub>11</sub> /C <sub>10</sub> ; Y <sub>10</sub> /C <sub>11</sub>                                                                                                                                        |
| 968.3439                                         | 2      |                                               | -1.0             | <sup>0,2</sup> A <sub>10</sub>                                                                                                                                                                             |
| 988.3593                                         | 1      | [2,1,2][0,0,0] <sup>o</sup> +Na <sup>+</sup>  | -1.3             | B <sub>5</sub>                                                                                                                                                                                             |
| 1002.3752                                        | 1      | [2,2,1][0,0,0] <sup>o</sup> +Na <sup>+</sup>  | -1.0             | Z <sub>5</sub>                                                                                                                                                                                             |
| 1006.3701                                        | 1      | [2,1,2][0,0,0]+Na <sup>+</sup>                | -1.0             | C <sub>5</sub>                                                                                                                                                                                             |
| 1009.8623                                        | 2      | [5,2,3][0,0,0] <sup>o</sup> +2Na <sup>+</sup> | -1.2             | B <sub>10</sub>                                                                                                                                                                                            |
| 1016.8703                                        | 2      | [5,3,2][0,0,0] <sup>o</sup> +2Na <sup>+</sup> | -1.0             | Z <sub>10</sub>                                                                                                                                                                                            |
| 1018.8675                                        | 2      | [5,2,3][0,0,0]+2Na <sup>+</sup>               | -1.2             | C <sub>10</sub>                                                                                                                                                                                            |
| 1025.8756                                        | 2      | [5,3,2][0,0,0]+2Na <sup>+</sup>               | -0.9             | Y <sub>10</sub>                                                                                                                                                                                            |
| 1031.3652                                        | 2      | [6,2,2][0,0,0] <sup>o</sup> +Na <sup>+</sup>  | -1.1             | Y <sub>11</sub> /B <sub>11</sub> ; Z <sub>11</sub> /C <sub>11</sub>                                                                                                                                        |
| 1040.3705                                        | 2      | [6,2,2][0,0,0]+2Na <sup>+</sup>               | -1.1             | Y <sub>11</sub> /C <sub>11</sub>                                                                                                                                                                           |
| 1049.3756                                        | 1      | [3,1,1][0,0,0] +Na <sup>+</sup>               | -1.3             | Y <sub>11</sub> /C <sub>6</sub> ; Y <sub>10</sub> /C <sub>7</sub> ; Y <sub>7</sub> /C <sub>10</sub> ; Y <sub>6</sub> /C <sub>11</sub>                                                                      |
| 1117.8993                                        | 2      | [6,2,3][0,0,0] <sup>o</sup> +2Na <sup>+</sup> | -1.3             | B <sub>11</sub>                                                                                                                                                                                            |
| 1126.9037                                        | 2      | [6,2,3][0,0,0]+2Na <sup>+</sup>               | -2.1             | C <sub>11</sub>                                                                                                                                                                                            |
| 1204.4327                                        | 1      | [3,1,2][0,0,0] <sup>o</sup> +Na <sup>+</sup>  | -2.1             | B <sub>6</sub>                                                                                                                                                                                             |
| 1236.4599                                        | 1      | [3,2,1][0,0,0] +Na <sup>+</sup>               | -1.2             | Y <sub>6</sub>                                                                                                                                                                                             |
| 1247.4393                                        | 1      | [4,1,1][0,0,0] <sup>o</sup> +Na <sup>+</sup>  | -1.4             | Y <sub>11</sub> /B <sub>7</sub> ; Z <sub>11</sub> /C <sub>7</sub> ; Y <sub>7</sub> /B <sub>11</sub> ; Z <sub>7</sub> /C <sub>11</sub>                                                                      |
| 1265.4499                                        | 1      | [4,1,1][0,0,0]+Na <sup>+</sup>                | -1.3             | Y <sub>11</sub> /C <sub>7</sub> ; Y <sub>7</sub> /C <sub>11</sub>                                                                                                                                          |
| 1337.4713                                        | 1      |                                               | -1.0             | <sup>0,2</sup> A <sub>7</sub>                                                                                                                                                                              |
| 1434.5242                                        | 1      | [4,2,1][0,0,0] <sup>o</sup> +Na <sup>+</sup>  | -0.9             | Z <sub>7</sub>                                                                                                                                                                                             |
| 1438.5187                                        | 1      | [4,1,2][0,0,0] +Na <sup>+</sup>               | -1.2             | C <sub>7</sub>                                                                                                                                                                                             |
| 1452.5350                                        | 1      | [4,2,1][0,0,0] +Na <sup>+</sup>               | -0.7             | Y <sub>7</sub>                                                                                                                                                                                             |
| 1607.5910                                        | 1      | [4,2,2][0,0,0] <sup>o</sup> +Na <sup>+</sup>  | -2.0             | B <sub>8</sub> ; Z <sub>8</sub>                                                                                                                                                                            |
| 1625.6009                                        | 1      | [4,2,2][0,0,0] +Na <sup>+</sup>               | -2.4             | C <sub>8</sub> ; Y <sub>8</sub>                                                                                                                                                                            |

|                                                                                                                                                                                                            |   |                                              |      |                                 |
|------------------------------------------------------------------------------------------------------------------------------------------------------------------------------------------------------------|---|----------------------------------------------|------|---------------------------------|
| 1780.6608                                                                                                                                                                                                  | 1 | [4,2,3][0,0,0] <sup>o</sup> +Na <sup>+</sup> | -1.3 | B <sub>9</sub>                  |
| MS <sup>3</sup> Precursor ion m/z 833.3003 (1+), to simplify the nomenclature of the MS <sup>3</sup> fragment ions, Y <sub>4</sub> is assumed to be the precursor ion of MS <sup>3</sup> unless specified. |   |                                              |      |                                 |
| 412.1320                                                                                                                                                                                                   | 1 | [1,0,1][0,0,0] <sup>o</sup> +Na <sup>+</sup> | -1.7 | Y <sub>4</sub> /B <sub>10</sub> |
| 426.1469                                                                                                                                                                                                   | 1 | [1,1,0][0,0,0] <sup>o</sup> +Na <sup>+</sup> | -3.5 | Z <sub>2</sub>                  |
| 430.1417                                                                                                                                                                                                   | 1 | [1,0,1][0,0,0] +Na <sup>+</sup>              | -3.7 | Y <sub>4</sub> /C <sub>10</sub> |
| 444.1574                                                                                                                                                                                                   | 1 | [1,1,0][0,0,0] +Na <sup>+</sup>              | -3.5 | Y <sub>2</sub>                  |
| 473.1473                                                                                                                                                                                                   | 1 | [2,0,0][0,0,0] +Na <sup>+</sup>              | -3.8 | Y <sub>3</sub> /C <sub>11</sub> |
| 628.2051                                                                                                                                                                                                   | 1 | [2,0,1][0,0,0] <sup>o</sup> +Na <sup>+</sup> | -3.6 | Y <sub>4</sub> /B <sub>11</sub> |
| 646.2155                                                                                                                                                                                                   | 1 | [2,0,1][0,0,0] +Na <sup>+</sup>              | -3.7 | Y <sub>4</sub> /C <sub>11</sub> |
| 660.2312                                                                                                                                                                                                   | 1 | [2,1,0][0,0,0] +Na <sup>+</sup>              | -3.6 | Y <sub>3</sub>                  |
| 815.2890                                                                                                                                                                                                   | 1 | [2,1,1][0,0,0] <sup>o</sup> +Na <sup>+</sup> | -3.4 | Z <sub>4</sub>                  |
| 833.2993                                                                                                                                                                                                   | 1 | [2,1,1][0,0,0]+Na <sup>+</sup>               | -3.7 | Y <sub>4</sub>                  |

<sup>1</sup>Saccharide compositions are given as [GalNAcAN, QuiNAc, Qui4NFm] [HexNAc, Hex, Kdo].

<sup>o</sup> represents loss of water.



**Supplemental Table 5 Observed fragment ions for <sup>18</sup>O labeled [6,3,3][0,0,0] from multi-stage tandem MS in positive ion mode on an LTQ-Orbitrap XL mass spectrometer.**

| Product ion (m/z)                                | Charge | Saccharide Composition <sup>1</sup>                                            | Mass Error (ppm) | Fragmentation                                                                                      |
|--------------------------------------------------|--------|--------------------------------------------------------------------------------|------------------|----------------------------------------------------------------------------------------------------|
| MS <sup>2</sup> Precursor ion m/z 1221.4487 (2+) |        |                                                                                |                  |                                                                                                    |
| 428.1518                                         | 1      | [1,1,0][0,0,0] <sup>o</sup> + <sup>18</sup> O- <sup>16</sup> O+Na <sup>+</sup> | -1.8             | Z <sub>2</sub>                                                                                     |
| 446.1624                                         | 1      | [1,1,0][0,0,0] <sup>o</sup> + <sup>18</sup> O- <sup>16</sup> O+Na <sup>+</sup> | -1.7             | Y <sub>2</sub>                                                                                     |
| 473.1480                                         | 1      | [2,0,0][0,0,0] <sup>o</sup> +Na <sup>+</sup>                                   | -2.3             | Y <sub>11</sub> /C <sub>3</sub> ; Y <sub>7</sub> /C <sub>7</sub> ; Y <sub>3</sub> /C <sub>11</sub> |
| 628.2063                                         | 1      | [2,0,1][0,0,0] <sup>o</sup> +Na <sup>+</sup>                                   | -1.6             | B <sub>3</sub>                                                                                     |
| 646.2166                                         | 1      | [2,0,1][0,0,0] <sup>o</sup> +Na <sup>+</sup>                                   | -2.0             | C <sub>3</sub>                                                                                     |
| 662.2365                                         | 1      | [2,1,0][0,0,0] <sup>o</sup> + <sup>18</sup> O- <sup>16</sup> O+Na <sup>+</sup> | -1.9             | Y <sub>3</sub>                                                                                     |
| 815.2903                                         | 1      | [2,1,1][0,0,0] <sup>o</sup> +Na <sup>+</sup>                                   | -1.8             | B <sub>4</sub>                                                                                     |
| 835.3052                                         | 1      | [2,1,1][0,0,0] <sup>o</sup> + <sup>18</sup> O- <sup>16</sup> O+Na <sup>+</sup> | -1.6             | Y <sub>4</sub>                                                                                     |
| 988.3592                                         | 1      | [2,1,2][0,0,0] <sup>o</sup> +Na <sup>+</sup>                                   | -1.4             | B <sub>5</sub>                                                                                     |
| 1004.3791                                        | 1      | [2,2,1][0,0,0] <sup>o</sup> + <sup>18</sup> O- <sup>16</sup> O+Na <sup>+</sup> | -1.4             | Z <sub>5</sub>                                                                                     |
| 1018.8668                                        | 2      | [5,2,3][0,0,0] <sup>o</sup> +2Na <sup>+</sup>                                  | -1.9             | C <sub>10</sub>                                                                                    |
| 1022.3896                                        | 1      | [2,2,1][0,0,0] <sup>o</sup> + <sup>18</sup> O- <sup>16</sup> O+Na <sup>+</sup> | -1.4             | Y <sub>5</sub>                                                                                     |
| 1031.3651                                        | 2      | [6,2,2][0,0,0] <sup>o</sup> +2Na <sup>+</sup>                                  | -1.2             | Y <sub>11</sub> /B <sub>11</sub> ; Z <sub>11</sub> /C <sub>11</sub>                                |
| 1040.3703                                        | 2      | [6,2,2][0,0,0] <sup>o</sup> +2Na <sup>+</sup>                                  | -1.3             | Y <sub>11</sub> /C <sub>11</sub>                                                                   |
| 1076.3807                                        | 2      |                                                                                | -1.4             | <sup>0,2</sup> A <sub>11</sub>                                                                     |
| 1117.8996                                        | 2      | [6,2,3][0,0,0] <sup>o</sup> +2Na <sup>+</sup>                                  | -1.1             | B <sub>11</sub>                                                                                    |
| 1126.9044                                        | 2      | [6,2,3][0,0,0] <sup>o</sup> +2Na <sup>+</sup>                                  | -1.5             | C <sub>11</sub>                                                                                    |
| 1204.4337                                        | 1      | [3,1,2][0,0,0] <sup>o</sup> +Na <sup>+</sup>                                   | -1.2             | B <sub>6</sub>                                                                                     |
| 1438.5182                                        | 1      | [4,1,2][0,0,0] <sup>o</sup> +Na <sup>+</sup>                                   | -1.5             | C <sub>7</sub>                                                                                     |
| 1454.5386                                        | 1      | [4,2,1][0,0,0] <sup>o</sup> + <sup>18</sup> O- <sup>16</sup> O+Na <sup>+</sup> | -1.1             | Y <sub>7</sub>                                                                                     |
| 1607.5918                                        | 1      | [4,2,2][0,0,0] <sup>o</sup> +Na <sup>+</sup>                                   | -1.5             | B <sub>8</sub>                                                                                     |
| 1627.6068                                        | 1      | [4,2,2][0,0,0] <sup>o</sup> + <sup>18</sup> O- <sup>16</sup> O+Na <sup>+</sup> | -1.4             | Y <sub>8</sub>                                                                                     |
| 1780.6605                                        | 1      | [4,2,3][0,0,0] <sup>o</sup> +Na <sup>+</sup>                                   | -1.4             | B <sub>9</sub>                                                                                     |

<sup>1</sup>Saccharide compositions are given as [GalNAcAN, QuiNAc, Qui4NFm] [HexNAc, Hex, Kdo].

<sup>o</sup> represents loss of water.

**Supplemental Figure 1 Multi-stage tandem MS reveals the structural linkage for [4,2,2][0,0,0].** Tandem mass spectra of the SEC fraction enriched with [4,2,2][0,0,0] was recorded with an Orbitrap mass spectrometer in positive ion mode. CID with 20% normalized collision energy was applied to achieve fragmentation of the  $[M + 2Na]^{2+}$  at  $m/z$  824.2961 (A). The ion observed at  $m/z$  833.3009 in the MS<sup>2</sup> spectrum was isolated and CID was applied to obtain the MS<sup>3</sup> spectrum (B). Two dominant fragment ions at  $m/z$  646.2158 and 660.2314 in the MS<sup>3</sup> spectrum were isolated and fragmented to achieve MS<sup>4</sup> spectra (C and D). The fragment ions are designated using the Domon and Costello nomenclature (27). “/” is used for internal cleavages, and alternative assignments are shown above one another.

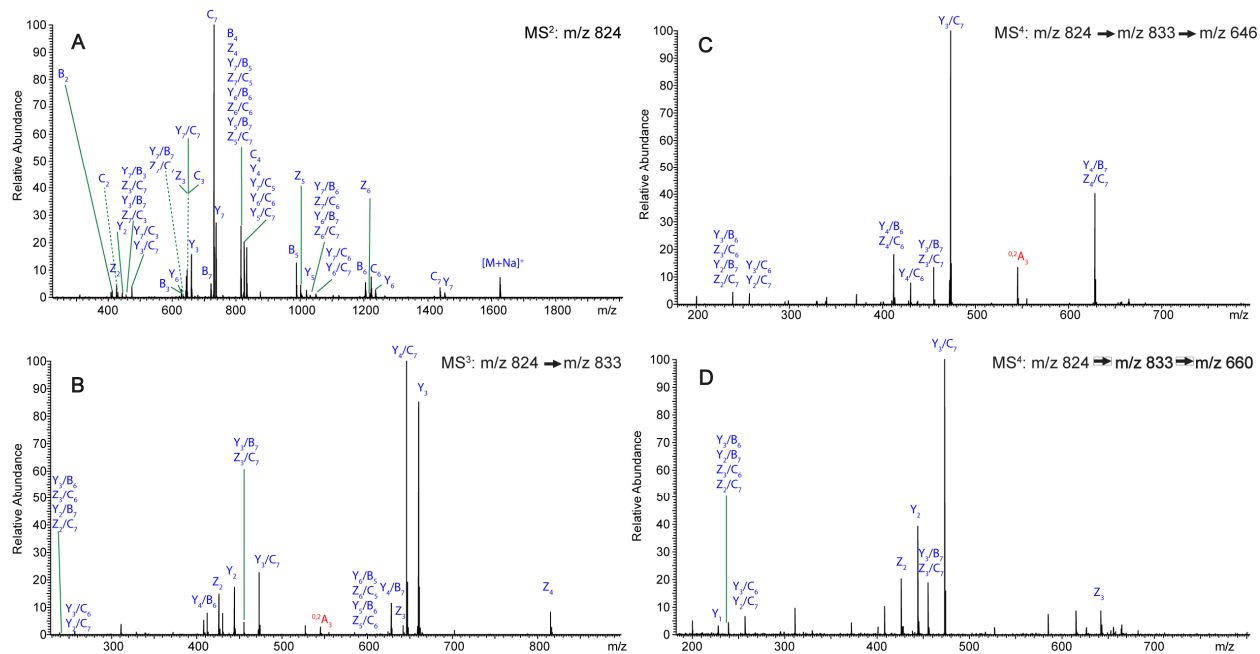

**Supplemental Figure 2 Multi-stage tandem mass spectra of the  $^{18}\text{O}$  labeled saccharide [4,2,2][0,0,0] reveals the reducing-end residue.** After quadrupole ion trap isolation of the  $^{18}\text{O}$  labeled saccharide [4,2,2][0,0,0] at  $m/z$  825.2987, CID with 20% normalized collision energy was applied to achieve fragmentation (A). The ion at  $m/z$  835.3053 further isolated from the  $\text{MS}^2$  spectrum and CID was applied to obtain  $\text{MS}^3$  spectrum (B). All fragments contain sodium.

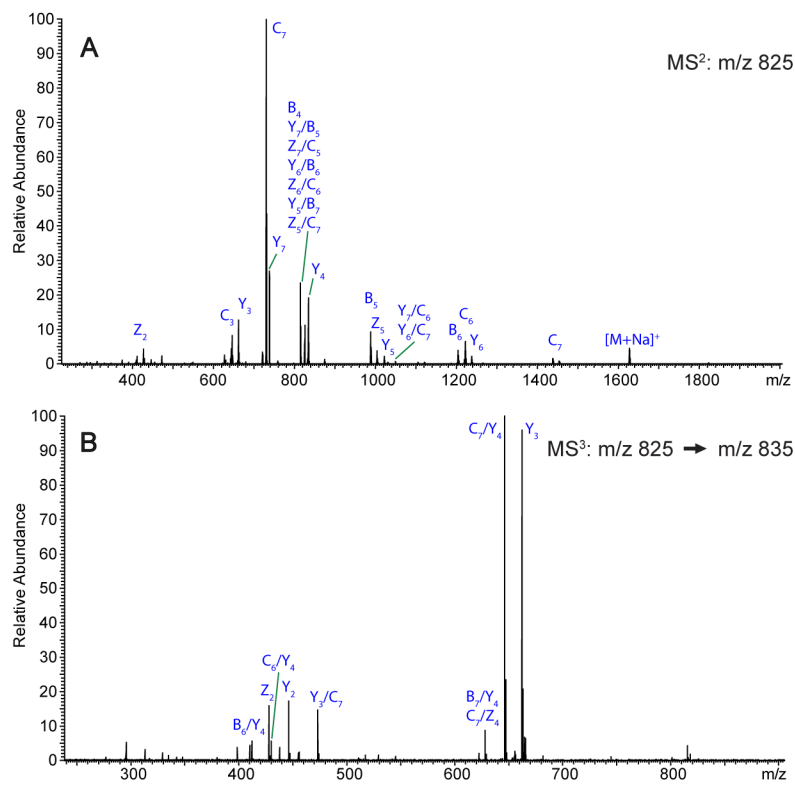



**Supplemental Figure 4 Multi-stage tandem MS of the  $[M + 2Na]^{2+}$   $m/z$  1220.4479 of the saccharide [6,3,3][0,0,0].** After quadrupole ion trap isolation  $m/z$  1220.4479, CID with 20% normalized collision energy was applied to achieve fragment ions (A). The ion at  $m/z$  833.3003 was further isolated from the  $MS^2$  spectrum and CID was applied to obtain  $MS^3$  spectrum (B).

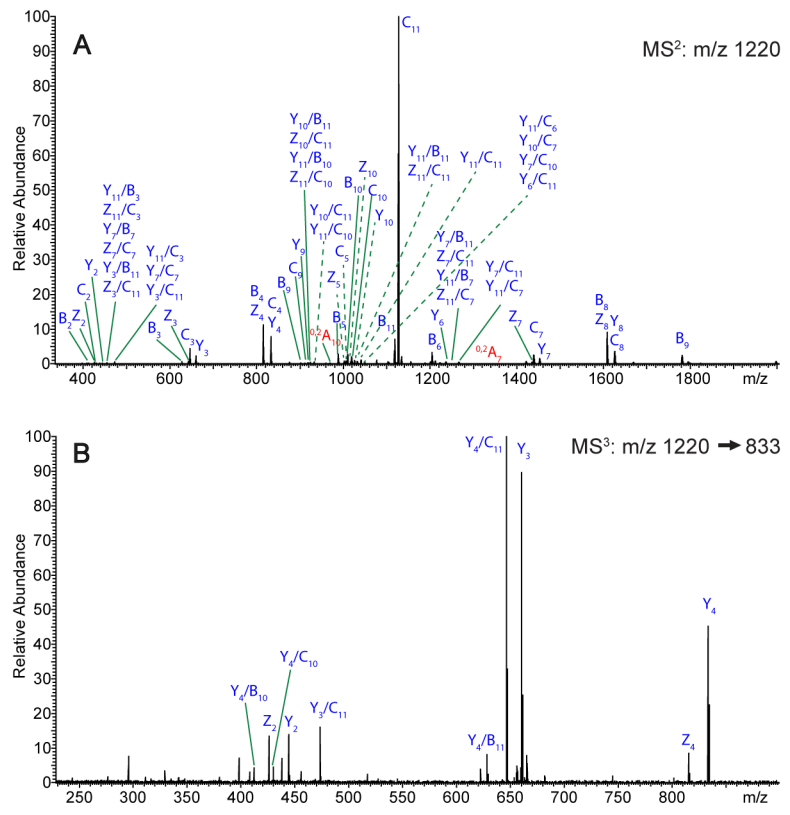

**Supplemental Figure 5 Tandem MS of the  $[M + 2Na]^{2+}$   $m/z$  1221.4487 of the  $^{18}O$ -labeled saccharide [6,3,3][0,0,0] reveals the reducing-end residue.** After quadrupole isolation  $m/z$  1221.4487, CID with 20% normalized collision energy was applied to achieve fragmentation of the  $^{18}O$  labeled saccharide [6,3,3][0,0,0].

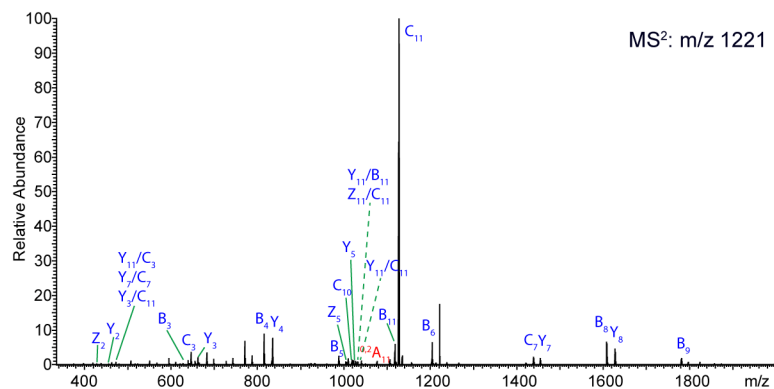

Supplement: NIHMS341198-supplement-1_si_001.pdf [file NIHMS341198-supplement-1_si_001.pdf]
